# Supplementary material for: Poverty dynamics, poverty thresholds and mortality: An age-stage Markovian model
Source: PubMed Central journal article supplement (PMC5955488; doi:10.1371/journal.pone.0195734), 2018-05-16
Supplement: pone.0195734.s002.pdf [file pone.0195734.s002.pdf]

---

## S1 Appendix One-period probability adjustments

### One-period probability adjustments

The time between interviews for HRS is normally distributed about 23.8 months (see S4 Fig). NLSY is bi-normally distributed about 12.4 and 24.1 months (S4 Fig), since after 1994 interviews were performed every 2 years as opposed to every one year. For HRS, NLSY-pre-1994, and NLSY-post-1994 we calculate regression parameters (see tables A-F in S1 Tables). The parameters are then logit transformed to calculate probability of survival between  $t$  and  $t + i$ , and probability of transitioning between  $t$  and  $t + i$ . We then adjust  $i$  to be 12 months, a one year period.

To calculate our one-year state transition rates from one age to the next age,  $t(x)_{21}$  and  $t(x)_{22}$ , from the logit transformed regression coefficients we use the following equation:

$$\begin{bmatrix} t_{11} & t_{12} \\ t_{21} & t_{22} \end{bmatrix} = \begin{bmatrix} r_{11} & r_{12} \\ r_{21} & r_{22} \end{bmatrix}^{12/i} \quad (20)$$

Where  $r_{21}$  and  $r_{22}$  are the logit transformed regression parameters and  $r_{11} = 1 - r_{21}$  and  $r_{12} = 1 - r_{22}$ . Note, every variable is a function of age,  $x$ , but we leave the  $x$  out here for clarity.  $i$  is either 12.4, 24.1, or 23.8 depending on the data-set, and for our matrix and power values we have a defined root. (In our case our matrices are nonsingular (with nonzero determinants, nonzero eigenvalues) and since all eigenvalues are positive and the matrix is real there is a distinguished root that is real. (Theorem 2.5 Higham and Al-Mohy (2010) [8])

To calculate our one-year survival rates for each age,  $s(x)_1$  and  $s(x)_2$ , from the logit transformed regression coefficients,  $c_1$  and  $c_2$ , we estimate with the following equations:

$$c_1 = s_1^2 t_{11} + s_1 s_2 t_{21} \quad (21)$$

$$c_2 = s_2^2 t_{22} + s_2 s_1 t_{12} \quad (22)$$

In this case, we estimate that  $i = 2$  and use this formula for NLSY-post-1994 and HRS. We use the transition probabilities,  $t_{11}$  etc., calculated from above. Here  $c_1$ , the logit transformed regression coefficient, is the probability of survival between  $t$  and  $t + i \approx t + 2$ , for those below threshold. And  $c_2$  is the same for those above income threshold. Again, every variable is a function of age  $x$ . We estimate that for NLSY-pre-1994  $c_1 = s_1$ .
