# Supplementary material for: Poverty dynamics, poverty thresholds and mortality: An age-stage Markovian model
Source: PubMed Central journal article supplement (PMC5955488; doi:10.1371/journal.pone.0195734), 2018-05-16
Supplement: pone.0195734.s004.pdf [file pone.0195734.s004.pdf]

**S1 Tables Regression coefficients**

**Table S1.A.** HRS logistic regression for each poverty threshold: Dependent Variable = Survival at time t+1

| Predictor                      | Estimate | Std. Error | t value | Pr(>  t )   |
|--------------------------------|----------|------------|---------|-------------|
| Intercept (Below 1× poverty)   | 7.311    | 0.353      | 20.717  | <2e-16 ***  |
| Slope (Below 1× poverty)       | -0.068   | 0.004      | -14.727 | <2e-16 ***  |
| Δ Intercept (Above 1× poverty) | 2.470    | 0.389      | 6.349   | 2.17e-10*** |
| Δ Slope (Above 1× poverty)     | -0.026   | 0.005      | 5.229   | 1.71e-07*** |
| Intercept (Below 2× poverty)   | 7.460    | 0.233      | 32.017  | <2e-16 ***  |
| Slope (Below 2× poverty)       | -0.069   | 0.003      | -22.920 | <2e-16 ***  |
| Δ Intercept (Above 2× poverty) | 2.804    | 0.306      | 9.166   | <2e-16 ***  |
| Δ Slope (Above 2× poverty)     | -0.031   | 0.004      | -7.986  | 1.41e-15*** |
| Intercept (Below 3× poverty)   | 7.920    | 0.200      | 39.621  | <2e-16 ***  |
| Slope (Below 3× poverty)       | -0.074   | 0.002      | -28.719 | <2e-16 ***  |
| Δ Intercept (Above 3× poverty) | 2.695    | 0.310      | 8.694   | <2e-16***   |
| Δ Slope (Above 3× poverty)     | -0.030   | 0.004      | -7.454  | 9.16e-14*** |

\*\*\*  $p < 0.01$ , \*\*  $p < 0.05$ , \*  $p < 0.1$

**Table S1.B.** HRS logistic regression: Dependent Variable = Poverty status at time t+1

| Predictor                      | Estimate | Std. Error | t value | Pr(>  t )   |
|--------------------------------|----------|------------|---------|-------------|
| Intercept (Below 1× poverty)   | 0.354    | 0.187      | 1.893   | 0.058*      |
| Slope (Below 1× poverty)       | -0.007   | 0.003      | -2.879  | 0.004***    |
| Δ Intercept (Above 1× poverty) | 2.418    | 0.235      | 10.307  | <2e-16***   |
| Δ Slope (Above 1× poverty)     | 0.009    | 0.003      | 2.774   | 0.005***    |
| Intercept (Below 2× poverty)   | -0.108   | 0.125      | -0.861  | 0.389       |
| Slope (Below 2× poverty)       | -0.012   | 0.002      | -6.784  | 1.17e-11*** |
| Δ Intercept (Above 2× poverty) | 3.935    | 0.161      | 24.483  | <2e-16***   |
| Δ Slope (Above 2× poverty)     | -0.017   | 0.002      | -7.567  | 3.86e-14*** |
| Intercept (Below 3× poverty)   | -0.211   | 0.110      | -1.913  | 0.056*      |
| Slope (Below 3× poverty)       | -0.016   | 0.002      | 10.194  | <2e-16***   |
| Δ Intercept (Above 3× poverty) | 4.257    | 0.147      | 29.003  | <2e-16***   |
| Δ Slope (Above 3× poverty)     | -0.025   | 0.002      | -11.987 | <2e-16***   |

\*\*\*  $p < 0.01$ , \*\*  $p < 0.05$ , \*  $p < 0.1$

**Table S1.C.** NLSY79-pre-1994 logistic regression for each poverty threshold:  
Dependent Variable = Survival at time t+1

| Predictor                      | Estimate | Std. Error | t value | $Pr(>  t )$  |
|--------------------------------|----------|------------|---------|--------------|
| Intercept (Below 1× poverty)   | 7.434    | 1.400      | 5.307   | 1.12e-07 *** |
| Slope (Below 1× poverty)       | -0.046   | 0.051      | -0.890  | 0.373        |
| Δ Intercept (Above 1× poverty) | 0.107    | 1.840      | 0.058   | 0.954        |
| Δ Slope (Above 1× poverty)     | 0.022    | 0.067      | 0.320   | 0.749        |
| Intercept (Below 2× poverty)   | 7.084    | 1.181      | 5.997   | 2.01e-09 *** |
| Slope (Below 2× poverty)       | -0.028   | 0.044      | -0.661  | 0.508        |
| Δ Intercept (Above 2× poverty) | 1.015    | 1.937      | 0.524   | 0.600        |
| Δ Slope (Above 2× poverty)     | -0.009   | 0.070      | -0.127  | 0.899        |
| Intercept (Below 3× poverty)   | 8.389    | 1.120      | 7.484   | 7.25e-14 *** |
| Slope (Below 3× poverty)       | -0.067   | 0.040      | -1.660  | 0.096*       |
| Δ Intercept (Above 3× poverty) | -2.284   | 2.179      | -1.048  | 0.294        |
| Δ Slope (Above 3× poverty)     | 0.103    | 0.080      | 1.290   | 0.197        |

\*\*\*  $p < 0.01$ , \*\*  $p < 0.05$ , \*  $p < 0.1$

**Table S1.D.** NLSY79-pre-1994 logistic regression for each poverty threshold:  
Dependent Variable = Poverty status at time t+1

| Predictor                      | Estimate | Std. Error | t value | $Pr(>  t )$  |
|--------------------------------|----------|------------|---------|--------------|
| Intercept (Below 1× poverty)   | 1.220    | 0.188      | 6.462   | 1.04e-10 *** |
| Slope (Below 1× poverty)       | -0.056   | 0.007      | -8.027  | 1.01e-15 *** |
| Δ Intercept (Above 1× poverty) | -0.032   | 0.255      | -0.128  | 0.898        |
| Δ Slope (Above 1× poverty)     | 0.124    | 0.009      | 12.982  | < 2e-16 ***  |
| Intercept (Below 2× poverty)   | 0.664    | 0.137      | 4.850   | 1.24e-06***  |
| Slope (Below 2× poverty)       | -0.059   | 0.005      | -11.515 | < 2e-16***   |
| Δ Intercept (Above 2× poverty) | -0.606   | 0.199      | -3.043  | 0.00234***   |
| Δ Slope (Above 2× poverty)     | 0.139    | 0.007      | 18.640  | <2e-16***    |
| Intercept (Below 3× poverty)   | -0.107   | 0.122      | -0.881  | 0.378        |
| Slope (Below 3× poverty)       | -0.049   | 0.004      | -10.720 | <2e-16***    |
| Δ Intercept (Above 3× poverty) | -0.597   | 0.188      | -3.180  | 0.001***     |
| Δ Slope (Above 3× poverty)     | 0.135    | 0.006      | 19.457  | <2e-16***    |

\*\*\*  $p < 0.01$ , \*\*  $p < 0.05$ , \*  $p < 0.1$

**Table S1.E.** NLSY79-post-1994 logistic regression for each poverty threshold:  
Dependent Variable = Survival at time t+1

| Predictor                      | Estimate | Std. Error | t value | $Pr(>  t )$  |
|--------------------------------|----------|------------|---------|--------------|
| Intercept (Below 1× poverty)   | 8.527    | 0.999      | 8.539   | <2e-16 ***   |
| Slope (Below 1× poverty)       | -0.105   | 0.023      | -4.490  | 7.14e-06 *** |
| Δ Intercept (Above 1× poverty) | 0.203    | 1.261      | 0.161   | 0.872        |
| Δ Slope (Above 1× poverty)     | 0.028    | 0.029      | 0.941   | 0.347        |
| Intercept (Below 2× poverty)   | 8.986    | 0.749      | 11.995  | <2e-16 ***   |
| Slope (Below 2× poverty)       | -0.108   | 0.017      | -6.240  | 4.41e-10 *** |
| Δ Intercept (Above 2× poverty) | -0.389   | 1.232      | -0.316  | 0.752        |
| Δ Slope (Above 2× poverty)     | 0.039    | 0.028      | 1.371   | 0.170        |
| Intercept (Below 3× poverty)   | 9.265    | 0.717      | 12.911  | <2e-16 ***   |
| Slope (Below 3× poverty)       | -0.107   | 0.016      | -6.414  | 1.43e-10***  |
| Δ Intercept (Above 3× poverty) | -0.779   | 1.332      | -0.585  | 0.559        |
| Δ Slope (Above 3× poverty)     | 0.041    | 0.031      | 1.315   | 0.188        |

\*\*\*  $p < 0.01$ , \*\*  $p < 0.05$ , \*  $p < 0.1$

**Table S1.F.** NLSY79-post-1994 logistic regression for each poverty threshold:  
Dependent Variable = Poverty status at time t+1

| Predictor                      | Estimate | Std. Error | t value | $Pr(>  t )$  |
|--------------------------------|----------|------------|---------|--------------|
| Intercept (Below 1× poverty)   | 0.650    | 0.236      | 2.751   | 0.00595 ***  |
| Slope (Below 1× poverty)       | -0.024   | 0.005      | -4.244  | 2.20e-05 *** |
| Δ Intercept (Above 1× poverty) | 2.153    | 0.306      | 7.029   | 2.11e-12 *** |
| Δ Slope (Above 1× poverty)     | 0.030    | 0.007      | 4.037   | 5.42e-05 *** |
| Intercept (Below 2× poverty)   | -0.329   | 0.173      | -1.903  | 0.057*       |
| Slope (Below 2× poverty)       | -0.013   | 0.004      | -3.229  | 0.001***     |
| Δ Intercept (Above 2× poverty) | 2.451    | 0.245      | 9.998   | <2e-16***    |
| Δ Slope (Above 2× poverty)     | 0.022    | 0.006      | 3.701   | 0.000215***  |
| Intercept (Below 3× poverty)   | -0.876   | 0.147      | -5.935  | 2.95e-09***  |
| Slope (Below 3× poverty)       | -0.009   | 0.003      | -2.588  | 0.009***     |
| Δ Intercept (Above 3× poverty) | 1.935    | 0.221      | 8.751   | <2e-16***    |
| Δ Slope (Above 3× poverty)     | 0.032    | 0.005      | 5.889   | 3.91e-09***  |

\*\*\*  $p < 0.01$ , \*\*  $p < 0.05$ , \*  $p < 0.1$
